# Supplementary material for: Hydrophilic polyelectrolyte microspheres as a template for poly(3,4-ethylenedioxythiophene) synthesis
Source: Royal Society of Chemistry journal article supplement (doi:10.1039/d3sm00372h), 2023-01-01
Supplement: d3sm00372h1.pdf [file d3sm00372h1.pdf]

# Hydrophilic polyelectrolyte microspheres as a template for poly(3,4-ethylenedioxythiophene) synthesis

Svetlana Laishevkina<sup>a</sup>, Olga Iakobson<sup>a</sup>, Natalia Saprykina<sup>a</sup>, Anatoly Dobrodumov<sup>a</sup>, Vladimir Chelibanov<sup>b</sup>,  
Elena Tomšik<sup>c</sup> and Natalia Shevchenko<sup>a\*</sup>

<sup>a</sup> Institute of Macromolecular Compounds, Russian Academy of Sciences, Bolshoy pr., 31, Saint-Petersburg, 199004, Russia.

<sup>b</sup> State University of Information Technologies, Mechanics and Optics, Kronverksky Pr. 49, bldg. A, St. Petersburg 197101, Russia

<sup>c</sup> Institute of Macromolecular Chemistry AS CR, Heyrovsky Sq. 2, Prague, Czech Republic.

## AUTHOR INFORMATION

### Corresponding Author

**Dr. Shevchenko N.**

natali.shevchenko29@gmail.com

## EXPERIMENTAL

**Conductometric Titration.** Conductometric titration was performed on 50 mL of the purified particle dispersion at 25°C in an atmosphere of purified nitrogen. During the measurements the content of the titration vessel was stirred with a magnetic stirrer continuously. The solid content of the particles was 0.1 g. The titrations were done with 0.01 M NaOH solution. The conductivity was measured using a conductivity dip cell and a Seven Multi (Metler Toledo, Switzerland) conductivity meter. Samples for potentiometric titration contained  $10^{-4}$  M NaCl as an indifferent electrolyte; SevenMulti pH meter was used for pH measurements. The samples of the particles were titrated three to four times and the average value was used (experimental error less than 2%).

To determine the extent of hydrogen and hydroxyl ions adsorption as a function of pH an equal volume of blank electrolyte was titrated at the same conditions as the latexes. For this purpose the difference of the concentrations of potential determining ions ( $H^+$ ,  $-OH^-$ ) between the particles and the blank electrolyte was determined.

**Purification of the resulting PEDOT complexes and polyelectrolyte microspheres.** The crude polymer dispersion was purified by exhaustive dialysis (Orange Scientific; molecular weight cut-off = 12-14 kDa) for 3 days to remove the residual monomers and the surfactant. As a result, sulfonate-containing microspheres (PSS) were obtained. The dry residue (D.R.) was determined by gravimetric analysis: 1 mL of latex was dried to constant weight.

The synthesis of 3,4-ethylenedioxythiophene (EDOT) was carried out according to the following procedure: 56  $\mu$ l (0.53 mmol) of EDOT and 2 ml of ethanol were mixed in a bottle, after which 4.6 ml of HCOOH (>95%) was added (HCOOH/EDOT ratio = 75, w/w). 0.1 g of polymer template was placed into the resulting solution. The reaction was carried out at room temperature for 10 days. Then the polyelectrolyte complexes were washed with ethanol.
